# Supplementary material for: Reduced frequency of lateral root branching improves N capture from low-N soils in maize
Source: PubMed Central journal article supplement (PMC4378636; doi:10.1093/jxb/erv007), 2015-02-13

**Reduced frequency of lateral root branching improves N capture from low N soils in maize.** *Ai Zhan and Jonathan P Lynch*

**Supplementary Table S1.** List of 18 recombinant inbred lines (RILs) selected from the intermated B73 × Mo17 population (IBM). Column displays the population of origin and RIL number for each line, while initial classification at selection based on lateral root number and length is shown in the column entitled Classification at selection. The tick (√) and dash (-) means genotypes used and not used in greenhouse mesocosms (GH), Rock Spring in USA (RS) and South Africa (SA).

| <b>Genotype</b> | <b>Classification at selection</b> | <b>GH</b> | <b>RS</b> | <b>SA</b> |
|-----------------|------------------------------------|-----------|-----------|-----------|
| M0067           | FL                                 | √         | √         | √         |
| M0075           | FL                                 | √         | -         | -         |
| M0079           | FL                                 | √         | √         | √         |
| M0086           | FL                                 | √         | √         | √         |
| M0096           | FL                                 | √         | -         | -         |
| M0098           | MS                                 | √         | -         | √         |
| M00134          | MS                                 | √         | √         | -         |
| M00157          | FL                                 | √         | -         | √         |
| M00182          | MS                                 | √         | √         | -         |
| M00206          | MS                                 | √         | √         | -         |
| M00283          | MS                                 | √         | -         | -         |
| M00295          | MS                                 | √         | -         | √         |
| M00303          | MS                                 | √         | -         | √         |
| M00304          | FL                                 | √         | √         | √         |
| M00321          | MS                                 | √         | √         | √         |
| M00327          | FL                                 | √         | √         | √         |
| M00361          | FL                                 | √         | -         | -         |
| M00362          | MS                                 | √         | √         | -         |

**Supplementary Fig. S1** Images showing phenotypic variation in lateral root branching density and length under low nitrogen conditions selected from South Africa experiment site (SA). The left panel was the many but short (MS) phenotype (M0321, A-F), and right panel was the few but long (FL) phenotype (M0304, G-L). In each panel, images from up to down were the 5<sup>th</sup>, 4<sup>th</sup>, 3<sup>rd</sup>, 2<sup>nd</sup>, 1<sup>st</sup> whorl of crown root, and the primary and seminal root, separately. The representative roots of MS and FL were selected from the same replicate.

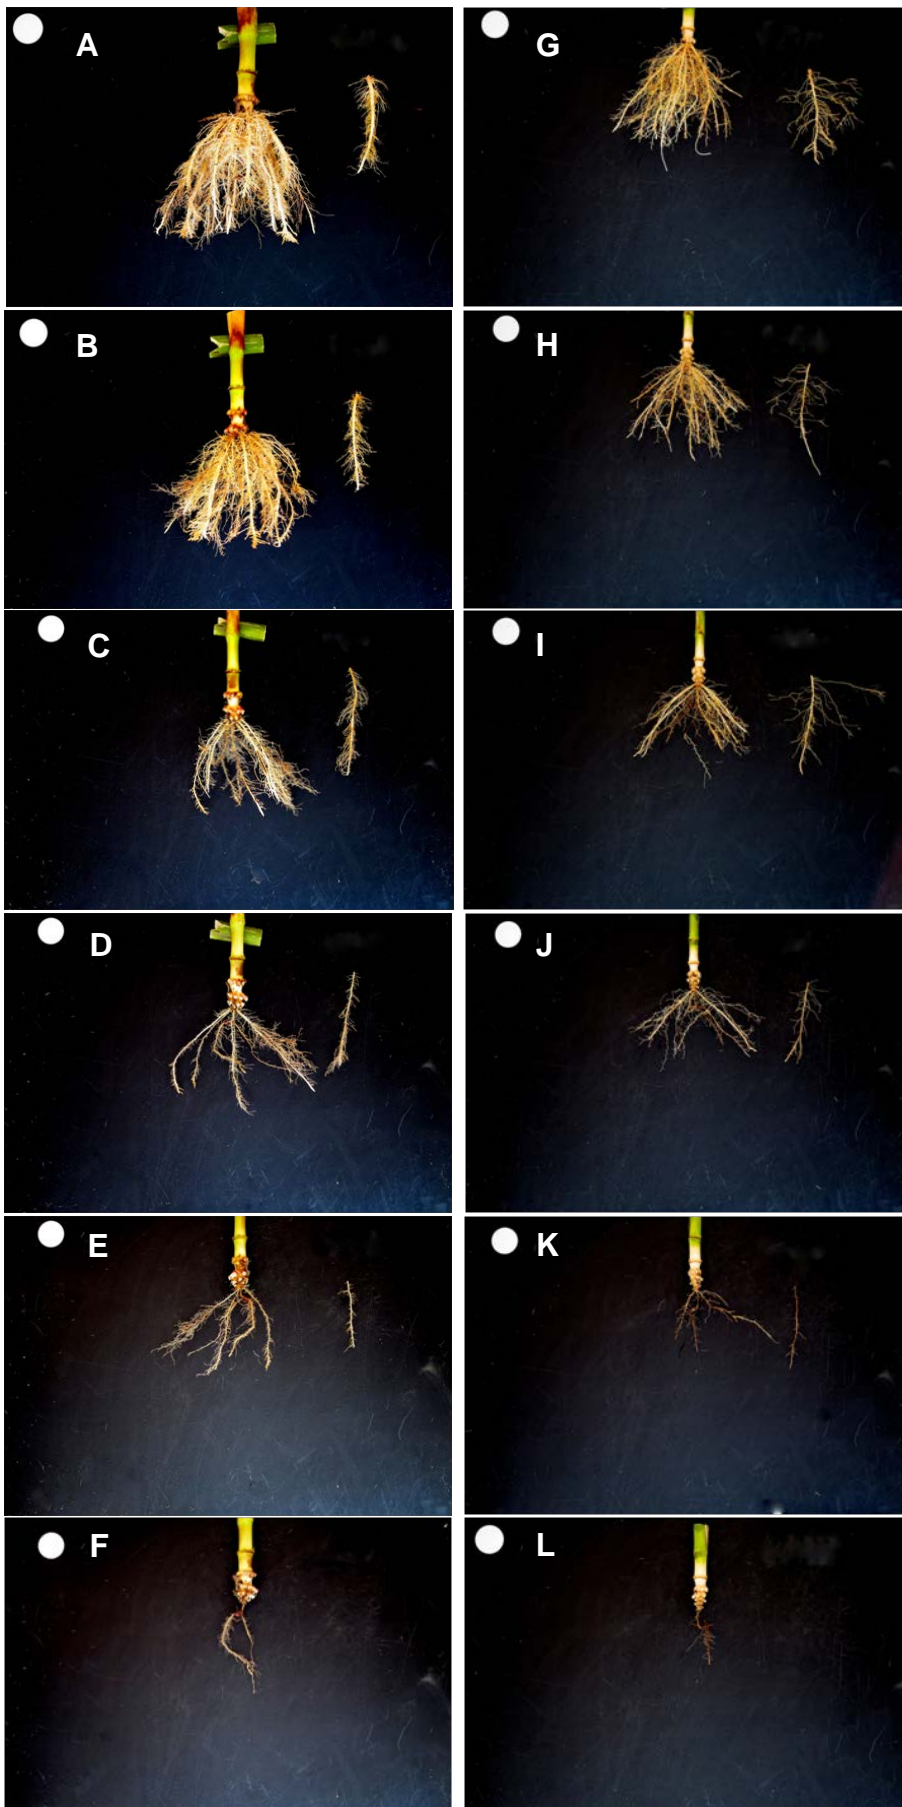

Supplement: supp_erv007_jexbot136499_file001.pdf [file supp_erv007_jexbot136499_file001.pdf]
